# Supplementary material for: An E2F1/DDX11/EZH2 Positive Feedback Loop Promotes Cell Proliferation in Hepatocellular Carcinoma
Source: PubMed Central journal article supplement (PMC7892623; doi:10.3389/fonc.2020.593293), 2021-02-05
Supplement: DataSheet_1.pdf [file DataSheet_1.pdf]

### Supplementary data

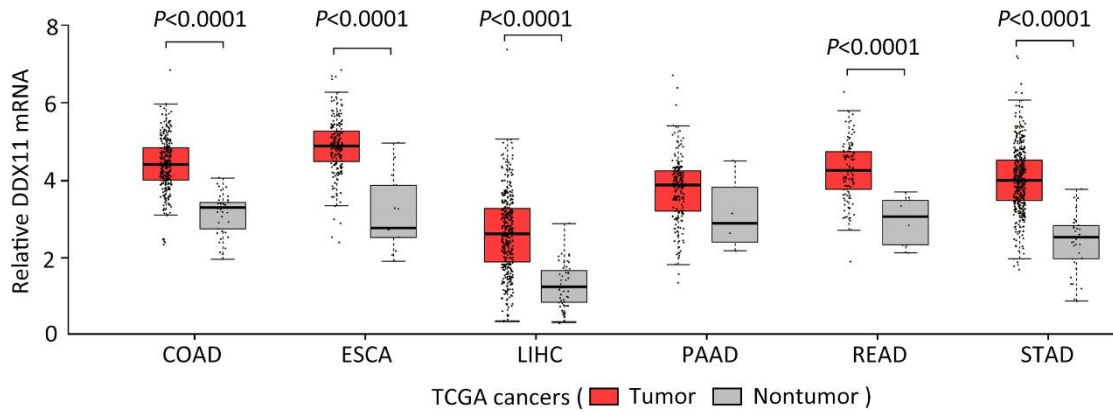

**Supplementary figure 1.** The expression of DDX11 mRNA in gastrointestinal cancers in TCGA. COAD, Colon adenocarcinoma; ESCA, Esophageal carcinoma; LIHC, Liver hepatocellular carcinoma; PAAD, Pancreatic adenocarcinoma; READ, Rectum adenocarcinoma; STAD, Stomach adenocarcinoma.

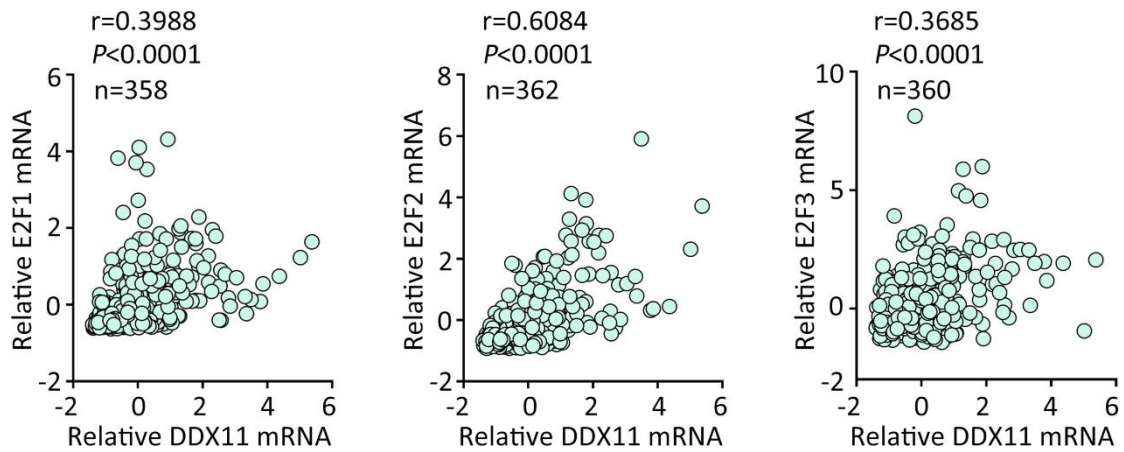

**Supplementary figure 2.** The correlation of E2F transcriptional factors and DDX11 in TCGA samples.

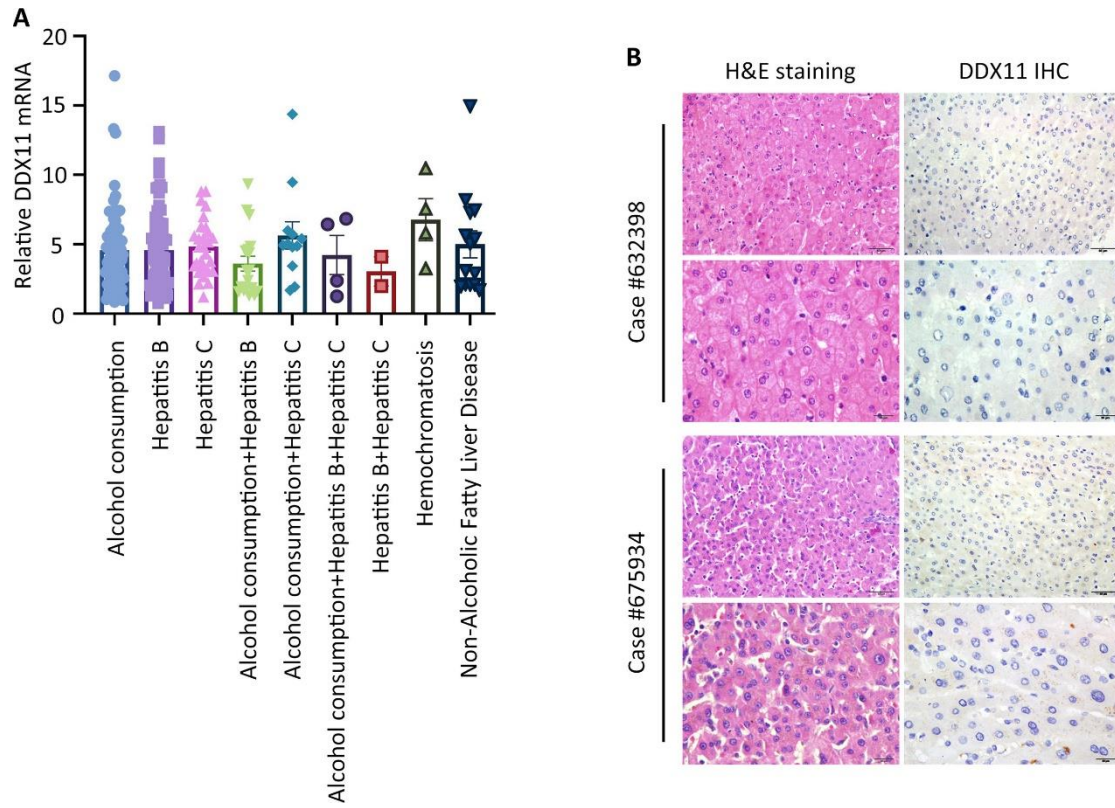

**Supplementary figure 3. A.** Association of DDX11 expression and HCC risk factors in TCGA patients with HCC. **B.** DDX11 protein expression in cirrhotic tissues adjacent to HCC in SYSUCC cohort.
